# Supplementary material
Source: Springer Nature journal article supplement (https://www.springermedizin.de/resource/supplementary/11689_2013_49_MOESM3_ESM.pdf/9673118)

relative expression of *FMR1*

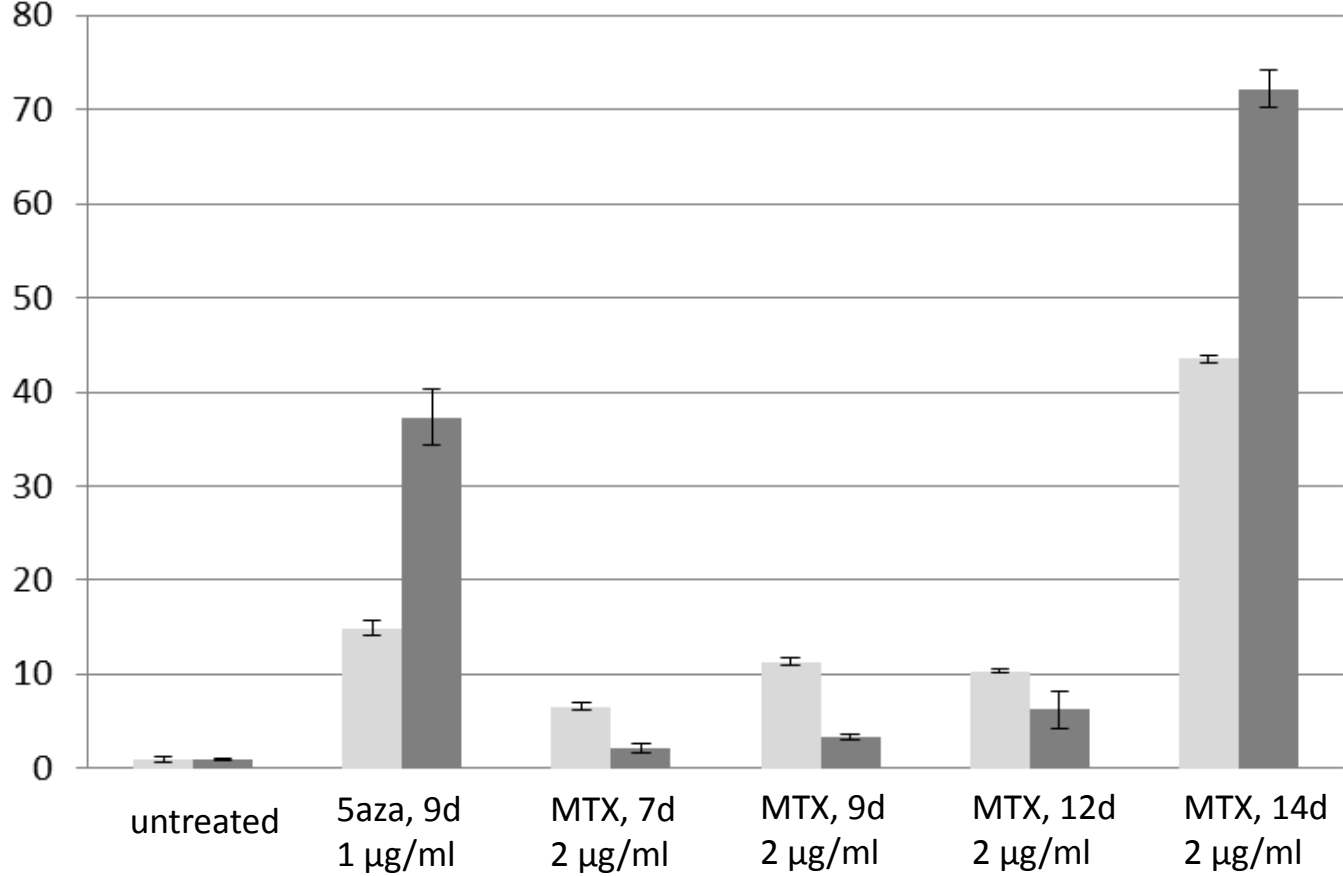

Supplement: MOESM3 [file 9673118]
